# Supplementary material for: Characteristics Associated with Tumor Development in Individuals Diagnosed with Beckwith–Wiedemann Spectrum: Novel Tumor-(epi)Genotype-Phenotype Associations in the BWSp Population
Source: MDPI journal article supplement (doi:10.3390/genes12111839), 2021-11-21
Supplement: s1 [file s1]

## **APPENDIX A: Detailed Methodology for BWSp Study Cohort and Selected Case Series**

### **CONTENT SUMMARY:**

|                                                                                             |            |
|---------------------------------------------------------------------------------------------|------------|
| <b>List of Common Abbreviations</b> (Table A1)                                              | page: 2    |
| <b>Description of BWS Registry Database Variables</b> (Table A2)                            | pages: 3-4 |
| <b>Exploratory Analyses Methodology</b> (section)                                           | pages: 5-7 |
| <b>Case Series Review Methodology</b> (section)<br>Includes BWSp Scoring Methods (Table A3) | page: 8    |

**Table A1.** List of Abbreviations Commonly Used in Study Data Tables.

| Abbreviation  | Definition                                                                                                        |
|---------------|-------------------------------------------------------------------------------------------------------------------|
| 11p15         | Chromosome 11 region associated with BWSp                                                                         |
| AACR          | American Association for Cancer Research                                                                          |
| AFP           | Alpha-fetoprotein                                                                                                 |
| ART           | Assisted Reproductive Techniques                                                                                  |
| AWD           | Abdominal Wall Defect                                                                                             |
| BWS           | Beckwith-Wiedemann Syndrome                                                                                       |
| BWSp          | Beckwith-Wiedemann Spectrum                                                                                       |
| BWSp-ICG      | International Consensus Group for BWSp                                                                            |
| DMR           | Differentially methylation region                                                                                 |
| FNS           | Facial Nevus Simplex                                                                                              |
| GI            | Gastrointestinal                                                                                                  |
| GOM           | Gain of Methylation (hypermethylation)                                                                            |
| GU            | Genitourinary                                                                                                     |
| HB            | Hepatoblastoma                                                                                                    |
| HI            | Hyperinsulinism                                                                                                   |
| ILO           | Isolated Lateralized Overgrowth (or asymmetry)                                                                    |
| IC1           | Imprinting Control region 1 ( <i>H19/IGF2:IG-DMR</i> )                                                            |
| IC2           | Imprinting Control region 2 ( <i>KCNQ1OT1:TSS-DMR</i> )                                                           |
| ICG           | International Consensus Group                                                                                     |
| ICG-Pregnancy | Suggestive pregnancy features included in BWSp-ICG clinical scoring system (polyhydramnios and/or placentomegaly) |
| ICSI          | Intracytoplasmic sperm injection                                                                                  |
| IVF           | In Vitro Fertilization                                                                                            |
| LGA           | Large for gestational age (>2 standard deviations above mean)                                                     |
| LO            | Lateralized Overgrowth (or asymmetry)                                                                             |
| LOM           | Loss of Methylation (hypomethylation)                                                                             |
| NBL           | Neuroblastoma                                                                                                     |
| PBL           | Pancreatoblastoma                                                                                                 |
| pUPD11        | Paternal uniparental isodisomy of chromosome 11                                                                   |
| SNP array     | Single nucleotide polymorphism (SNP) array                                                                        |
| TRAP          | Twin Reversed Arterial Perfusion (TRAP) Sequence                                                                  |
| TTTS          | Twin-Twin Transfusion Syndrome                                                                                    |
| WT            | Wilms Tumor                                                                                                       |

**Table A2.** Description and Definition of Variables Selected from the 2019 BWSp Registry database.

| Variable Category and Subgroups  | Definition, Criteria, and/or Notes                                                                                                                                                                                                                |
|----------------------------------|---------------------------------------------------------------------------------------------------------------------------------------------------------------------------------------------------------------------------------------------------|
| <b>BWSp Epigenotype Groups</b>   | BWSp subtype identified in patient sample with positive 11p15 abnormality (i.e. blood or other tissue if blood negative or not available)<br>Blood utilized as 'reference subtype' (positive or negative) with tissue considered secondary source |
| IC1 GOM                          | DMR1 involvement only                                                                                                                                                                                                                             |
| IC2 LOM                          | DMR2 involvement only                                                                                                                                                                                                                             |
| pUPD11                           | DMR1 and DMR2 involvement                                                                                                                                                                                                                         |
| <b>BWSp Spectrum Groups</b>      | <b>Criteria established for 2019 BWSp cohort published***</b>                                                                                                                                                                                     |
| Classic BWS/BWSp                 | Clinical score $\geq 6$ points with $\geq 2$ cardinal features<br>(except if 2 cardinal features present=HI + LO)                                                                                                                                 |
| Atypical BWSp                    | Clinical score $< 6$ points with $\geq 1$ cardinal feature; OR<br>Clinical score $\geq 6$ points with HI+LO as only 2 cardinal features; OR<br>Presenting feature for BWSp diagnosis was HI and/or Tumor                                          |
| Isolated LO                      | Clinical score $< 4$ with LO as only cardinal feature                                                                                                                                                                                             |
| <b>Positive (+)Blood Testing</b> | Positive 11p15 methylation abnormality in blood sample<br><i>Patients with negative blood testing were found to have positive 11p15 in at least one tissue sample</i>                                                                             |
| <b>Patient sex</b>               | Male or Female ( <i>male sex selected as reference</i> )                                                                                                                                                                                          |
| <b>Diversity Groups</b>          | <b>Self-reported demographics</b>                                                                                                                                                                                                                 |
| 'White/Caucasian' only           | White or Caucasian and non-Hispanic                                                                                                                                                                                                               |
| 'Mixed' race/ethnicity           | More than one race reported, or race with Hispanic ethnicity reported                                                                                                                                                                             |
| 'Other' race/ethnicity           | Diversity group other than white, or identified as Hispanic only                                                                                                                                                                                  |
| <b>Conception Type</b>           |                                                                                                                                                                                                                                                   |
| Natural                          | Spontaneous conception without any form of ART utilized                                                                                                                                                                                           |
| IVF/ICSI                         | IVF and/or ICSI reported or documented as fertility method                                                                                                                                                                                        |
| Other ART                        | Other form of ART reported or documented<br>Includes hormone stimulation, intrauterine insemination (IUI), etc                                                                                                                                    |
| <b>Multiple Gestation</b>        | Patient classified as twin or higher order (or singleton) at birth                                                                                                                                                                                |
| <b>ICG-Pregnancy</b>             | Features during pregnancy classified as 'suggestive' in scoring system                                                                                                                                                                            |
| Polyhydramnios                   | Increased fluid levels (subjectively noted or requiring amnioreduction)                                                                                                                                                                           |
| Placentomegaly                   | Large placenta for GA (subjectively noted or through pathology)                                                                                                                                                                                   |
| <b>Preterm Birth</b>             | Gestational Age (GA) less than 37 weeks<br>Criteria defined by World Health Organization (WHO)                                                                                                                                                    |
| <b>Common Features</b>           |                                                                                                                                                                                                                                                   |
| Macroglossia                     | Tongue enlargement; Includes asymmetric enlargement                                                                                                                                                                                               |
| BWSp-LO                          | Lateralized Overgrowth due to BWSp/11p15<br>Defined as visible muscle bulk difference or $> 5\%$ measurable size discrepancy                                                                                                                      |
| Ear creases/pits                 | Linear indents/grooves on earlobes or small holes near helix                                                                                                                                                                                      |
| Facial Nevus Simplex             | Reddish appearance on forehead, eyelids, and/or nose (red birthmark on face that resolves – not port-wine stain)                                                                                                                                  |

|                               |                                                                                                                                |
|-------------------------------|--------------------------------------------------------------------------------------------------------------------------------|
| Large Size (LGA)              | Birthweight classified as Large for Gestational Age (>2SDs above the population mean) or 'LGA at birth' noted on birth records |
| <b>Abdominal Wall Defects</b> | Malformation of abdominal wall development<br><i>(can be Severe, Mild, or Not Present in patients with BWSp)</i>               |
| Omphalocele                   | Severe form of AWD                                                                                                             |
| Minor defect                  | Umbilical hernia and/or diastasis recti<br>Individuals with history of omphalocele recorded as 'no minor defect'               |
| <b>Hypoglycemia</b>           |                                                                                                                                |
| Severe (HI)                   | Hyperinsulinism lasting >1 week and requiring escalated treatment                                                              |
| Transient                     | Hypoglycemia lasting <1 week                                                                                                   |
| <b>Organomegaly</b>           | <b>Enlarged organ or organs, including spleen; Recorded for patients with available data pre-tumor diagnosis</b>               |
| Nephromegaly                  | Kidney enlargement (includes asymmetric enlargement of one kidney or bilateral enlargement)                                    |
| Hepatomegaly                  | Liver enlargement on imaging or by palpation (hepatosplenomegaly)                                                              |
| Splenomegaly                  | Spleen enlargement on imaging or by palpation (hepatosplenomegaly)                                                             |

## EXPLORATORY ANALYSES METHODOLOGY SECTION

Description of comparison group selection and case-control criteria applied for each population:

### **BWSp Study Population**

Inclusions: all patients in study cohort (n=215); Subtypes: IC2 LOM, IC1 GOM, pUPD11

Exclusions Applied: none

Case Criteria: History of Tumor Development (n=43)

Control Criteria: No history of tumor development (n=172)

Full Results Available: Appendix B: Table B3

### **Classic BWS Phenotype Population**

Inclusions: patients classified with 'Classic BWSp' in 2019 cohort (n=144)

Exclusions Applied: patients classified with 'Atypical BWSp' or 'ILO' (or those unclassified)

Case Criteria: Tumor - Classic BWS Phenotype (n=20)

Control Criteria: No Tumor – Classic BWS Phenotype (n=124)

Full Results Available: Appendix B: Table B4

### **Atypical BWSp/ ILO Phenotype Population**

Inclusions: patients classified with 'Atypical BWSp' or 'ILO' phenotypes in 2019 cohort (n=62)

Exclusions Applied: patients classified with 'Classic BWSp' (or those unclassified)

Case Criteria: Tumor – Atypical BWSp/ILO Phenotype (n=22)

Control Criteria: No Tumor – Atypical BWSp/ILO Phenotype (n=40)

Full Results Available: Appendix B: Table B5

### **Lateralized Overgrowth (LO) Phenotype Population**

Inclusions: patients with LO recorded as clinical feature (n=152)

Exclusions Applied: patients with LO recorded as 'not present/affected' (or those with LO status unknown)

Case Criteria: Tumor – LO Phenotype (n=34)

Control Criteria: No Tumor – LO Phenotype (n=118)

Full Results Available: Appendix B: Table B6

### **Organomegaly Phenotype Population**

Inclusions: patients with organomegaly recorded as clinical feature (n=66); includes enlargement of kidneys, liver, and/or spleen

Exclusions Applied: patients with organomegaly recorded as 'not present' (or those with organomegaly status unknown)

Case Criteria: Tumor – Organomegaly Phenotype (n=17)

Control Criteria: No Tumor – Organomegaly Phenotype (n=49)

Full Results Available: Appendix B: Table B7

### **Wilms Tumor (WT)-Phenotype Comparisons**

Inclusions: study cohort with history of WT development and those without history of any tumor development (n=201)

Exclusions Applied: patients with history of development of HB or other tumor type

Case Criteria: patients with WT/bilateral nephroblastomatosis development (BWSp-WT, n=29)

Control Criteria: No Tumor Population (n=172)

Full Results Available: Appendix B: Table B8

### **Hepatoblastoma (HB)-Phenotype Comparisons**

Inclusions: study cohort with history of HB development and those without history of tumor development (n=183)

Exclusions Applied: patients with history of development of WT or other tumor type

Case Criteria: patients with HB development; (BWSp-HB, n=11)

Control Criteria: No Tumor Population (n=172)

*Note – same ‘control group’ for WT and Tumor-Phenotype comparisons*

Full Results Available: Appendix B: Table B9

### **IC1 GOM-BWSp Population = all patients with IC1 GOM in study cohort (n=30)**

Exclusions Applied: patients with IC2 LOM or pUPD11

Case Criteria: History of Tumor Development (n=16)

Control Criteria: No history of tumor development (n=14)

Full Results Available: Appendix B: Table B10

### **IC2 LOM-BWSp Population = all patients with IC2 LOM in study cohort (n=112)**

Exclusions Applied: patients with IC1 GOM or pUPD11

Case Criteria: History of Tumor Development (n=5)

Control Criteria: No history of tumor development (n=107)

Full Results Available: Appendix B: Table B11

### **pUPD11-BWSp Population = all patients with pUPD11 in study cohort (n=73)**

Inclusion: patients with both IC1 GOM and IC2 LOM due to pUPD11

Exclusions Applied: patients with IC2 LOM or IC1 GOM only

Case Criteria: History of Tumor Development (n=22)

Control Criteria: No history of tumor development (n=51)

Full Results Available: Appendix B: Table B12

### **pUPD11-WT Phenotype Comparisons**

Inclusions: patients in study cohort with pUPD11 and history of WT development, and those with pUPD11 without history of tumor development (n=62)

Exclusions Applied: patients with pUPD11 and history of development of HB and/or other tumor

Case Criteria: pUPD11-WT Population (n=11)

Control Criteria: pUPD11 No-Tumor Population (n=51)

Full Results Available: Appendix B: Table B13

### **pUPD11-HB Phenotype Comparisons**

Inclusions: patients in study cohort with pUPD11 and history of HB development, and those with pUPD11 without history of tumor development (n=60)

Exclusions Applied: patients with pUPD11 and history of development of WT or other tumor type

Case Criteria: pUPD11-HB Population (n=9)

Control Criteria: pUPD11 No-Tumor Population (n=51)

*Note – same ‘control group’ for WT and Tumor-Phenotype comparisons*

Full Results Available: Appendix B: Table B14

## CASE SERIES REVIEW METHODOLOGY SECTION

### Additional Characteristics of Interest in Record Review:

To evaluate additional characteristics and phenotype data collected during the retrospective case series review, we designated the following variable groups:

- Peri-Conception Profile: (1) Type of conception; (2) singleton/multiple; (3) history of twinning or infertility in immediate family members (siblings, parents).
- Prenatal Environment Profile: (1) Pregnancy complications; (2) Prenatal phenotypes detected through imaging.
- Neonatal Profile: (1) Birth outcome; (2) Phenotype presentation during neonatal period (<30 days); (3) Historical prenatal phenotype (noted subjectively or detected through imaging).
- BWSp Profiles: (1) ICG Clinical Score; (2) BWS Spectrum Group; (3) Epigenotype profile(s) established in designated clinical testing laboratories; (4) Results of other laboratories (as applicable).
- Tumor Presentation Profile: (1) Type of tumor(s) that developed; (2) Detection type: BWSp screening, Incidental (other screening), Symptomatic; (3) Tumor detected pre- or post-BWSp diagnosis.

### Methodology for BWSp Clinical Scoring System:

**Table A3.** Methodology for BWSp Clinical Scoring System.

|                                       |                                                                                                                                                                                                |
|---------------------------------------|------------------------------------------------------------------------------------------------------------------------------------------------------------------------------------------------|
| Cardinal Features<br>(2 points each)  | Macroglossia; Omphalocele; LO; HI; Multifocal/bilateral WT or nephroblastomatosis; Pathology Features (adrenal cortex cytomegaly, placental mesenchymal dysplasia, or pancreatic adenomatosis) |
| Suggestive Features<br>(1 point each) | Pregnancy; LGA; FNS; ear creases/pits; minor AWD; transient hypoglycemia; nephromegaly/hepatomegaly; Typical BWSp tumor                                                                        |
| ICG Score System                      | (# Cardinal Features x 2 points) + (# Suggestive Features x 1 point)                                                                                                                           |
| Study Score System                    | Tumors not included in scoring; Pathology included for scores in present study<br>( <i>was not included in 2019 study scores</i> )                                                             |



## APPENDIX B: Supporting Data and Information for Study Results

**Additional Population Characteristics (Tables B1 and B2)**      **pages: 2 - 3**

**Exploratory Analyses Results (Tables B3 – B14)**      **pages: 4 - 15**

Univariate comparisons were performed to evaluate the frequency of characteristics/features between the case-control groups to evaluate whether significant associations or trends were present between groups that could inform tumor-phenotype profiles. Categorical variables were compared with Pearson chi-square, and nominal variables were compared using Fisher's Exact; column proportion (z-testing) with Bonferroni correction methods was performed for all comparisons. Statistical significance was set at  $p < 0.05$  for all comparisons. The significance of the associations identified for each variable are differentiated by asterics for the strength of p-value demonstrated:  $*=p < 0.05$ ;  $**p < 0.01$ ;  $***p < 0.001$  (as appropriate). Significant differences identified through column proportion testing are denoted with footnotes in each of the tables. All statistical analyses were performed using IBM SPSS Statistics Version 26.

**Case Series Supporting Data (Tables B15 – B17)**      **pages: 16 - 18**

**Table B1.** Length of follow-up and confirmation of tumor development status in cohort.

|                                                   | Tumor Development Status Confirmed <sup>1</sup> |                             |                                        |                                    |
|---------------------------------------------------|-------------------------------------------------|-----------------------------|----------------------------------------|------------------------------------|
|                                                   | Dataset Review                                  |                             | Follow-Up                              |                                    |
| Review Period                                     | March 2019                                      | December 2020               | June 2021 <sup>4</sup>                 |                                    |
| <b>Total Patients Followed</b>                    | 215                                             | 215                         | 215                                    |                                    |
| <b>Total Years of Follow-Up <sup>2</sup></b>      | 1058 years                                      | 1426 years                  | 1481 years                             |                                    |
| <b>Average per patient</b>                        | 4.9 years                                       | 6.6 years                   | 6.9 years                              |                                    |
| <b>Median per patient</b>                         | 3y [IQR 1y;5y]                                  | 5y [IQR 3y;7y]              | 5y [IQR 3y;7y]                         |                                    |
| <b>Age at Last Follow-Up</b>                      | <b>Reviewed<br/>(n=215)</b>                     | <b>Reviewed<br/>(n=215)</b> | <b>No Additional<br/>Review (n=99)</b> | <b>Detailed Review<br/>(n=116)</b> |
| Birth – 1.9 years                                 | 72                                              | 8                           | 7                                      | -                                  |
| 2 years – 3.9 years                               | 59                                              | 43                          | 17                                     | 17                                 |
| 4 years – 6.9 years                               | 37                                              | 101                         | 49                                     | 40                                 |
| 7 years – 9.9 years                               | 18                                              | 19                          | 5                                      | 31                                 |
| 10 years – 17.9 years                             | 18                                              | 32                          | 15                                     | 19                                 |
| Adult (>18 years)                                 | 11                                              | 12                          | 6                                      | 6                                  |
| <b>Tumor of Uncertain Malignancy <sup>3</sup></b> | -                                               | -                           | -                                      | 3                                  |

<sup>1</sup> Status confirmed to best of our knowledge through medical record review, external record update requests, and BWS Registry contact as available.

<sup>2</sup> Years of follow-up from birth until date of last medical record and/or last BWS Registry contact.

<sup>3</sup> Tumors not originally classified as ‘typical BWSp tumor’ in dataset coding and/or those developed during observation period and were resected due to uncertain malignancy status prior to pathology information. All three patients had positive blood testing and BWSp diagnosis established prior to tumor detection and these tumor types were not malignant. Included two patients personally treated at our institution with adrenal tumors classified as ‘adrenal cortical neoplasm’ through pathology: a female with IC2 LOM with resection at 2 years, 5 months of age; and a female with pUPD11 with resection at 4 years, 1 month of age. An additional female patient with IC2 LOM enrolled through the BWS Registry had care at another institution for a renal pole mass that was resected at age 2 years, 11 months (*Pathology Report=Hyperlobulated kidney with severe medullary dysplasia and severe interstitial nephritis with extensive global sclerosis of glomeruli. Flanking lobules of renal tissue, no histopathological abnormality*).

<sup>4</sup> June 2021 follow-up was performed within patients at our institution and/or those with BWS Registry contact within the last 3 months.

**Table B2.** Rates of tumor development associated with BWSp clinical score criteria classification.

| Type of BWSp Tumor<br>(ICG-BWSp Criteria)    | Cohort Group<br>(n=215 patients) | Tumor Type<br>(n=46 tumors) | Tumor Types Associated with BWSp Subtypes          |
|----------------------------------------------|----------------------------------|-----------------------------|----------------------------------------------------|
| N=46 tumors                                  |                                  |                             |                                                    |
| <b>‘Cardinal Feature’ Tumor <sup>1</sup></b> | <b>14 (6.5%)</b>                 | <b>30.4%</b>                | <b>IC1 GOM (n=10); pUPD11 (n=3); IC2 LOM (n=1)</b> |
| Bilateral WT                                 | 11                               | 23.9%                       | IC1 GOM (n=8); pUPD11 (n=2); IC2 LOM (n=1)         |
| Bilateral Nephroblastomatosis                | 3                                | 6.5%                        | IC1 GOM (n=2); pUPD11 (n=1)                        |
| <b>‘Suggestive Feature’ Tumor</b>            | <b>29 (13.5%)</b>                | <b>63.0%</b>                | <b>pUPD11 (n=21); IC1 GOM (n=6); IC2 LOM (n=4)</b> |
| Unilateral WT                                | 15                               | 32.6%                       | pUPD11 (n=8); IC1 GOM (n=6); IC2 LOM (n=1)         |
| Hepatoblastoma (HB)                          | 11 <sup>2</sup>                  | 26.1% <sup>2</sup>          | pUPD11 (n=9); IC2 LOM (n=2)                        |
| Neuroendocrine Tumors                        | 4                                | 8.7%                        | pUPD11 (n=3); IC2 LOM (n=1)                        |
| Neuroblastoma                                | 2                                | 4.5%                        | IC2 LOM (n=1); pUPD11 (n=1)                        |
| Adrenocortical carcinoma                     | 1                                | 2.2%                        | pUPD11 <sup>3</sup>                                |
| Pheochromocytoma                             | 1                                | 2.2%                        | pUPD11                                             |
| Pancreatoblastoma                            | 1                                | 2.2%                        | pUPD11 <sup>3</sup>                                |

<sup>1</sup> ‘Bilateral WT’ includes those with WT diagnosed in both kidneys and/or WT in one kidney and bilateral nephroblastomatosis in other kidney; ‘Bilateral Nephroblastomatosis’ includes those without WT detected/diagnosed in either kidney.

<sup>2</sup> One patient with pUPD11 developed a second primary HB (confirmed through different pathology and somatic testing) – HB (n=12) accounted for within rate. One patient with IC2 LOM had recurrent HB diagnosed multiple times; last follow-up at age 7-8 years (not classified as a new primary in database).

<sup>3</sup> Patients also had history of HB development. Adrenocortical carcinoma diagnosis was pre-HB development and PBL diagnosis was post-HB development and resection.

**Table B3.** Tumor Phenotype Comparisons within BWSp Study Population.

| Population Characteristics          | Study Cohort<br>(n=215) | No Tumor<br>(n=172) | Tumor<br>(n=43)   | p-value            |
|-------------------------------------|-------------------------|---------------------|-------------------|--------------------|
| <b>Subtype Distributions</b>        |                         |                     |                   | NP                 |
| IC1 GOM                             | 30                      | 14                  | 16                |                    |
| IC2 LOM                             | 112                     | 107                 | 5                 |                    |
| pUPD11                              | 73                      | 51                  | 22                |                    |
| <b>Blood+</b>                       | 82.5%                   | 87.2%               | 64.3%             | 0.001**            |
| <b>Male sex</b>                     | 44.7%                   | 46.5%               | 37.2%             | 0.306              |
| <b>Diversity Groups</b>             |                         |                     |                   | 0.822              |
| ‘White/Caucasian’ only              | 67.5%                   | 68.1%               | 65.1%             |                    |
| ‘Mixed’ race/ethnicity              | 17.7%                   | 16.9%               | 20.9%             |                    |
| ‘Other’ race/ethnicity              | 14.8%                   | 15.1%               | 14.0%             |                    |
| <b>Conception Type</b>              |                         |                     |                   | 0.066 <sup>1</sup> |
| Natural                             | 80.0%                   | 77.4%               | 90.2%             |                    |
| IVF/ICSI                            | 19.0%                   | 22.0% <sup>1</sup>  | 7.3% <sup>1</sup> |                    |
| Other ART                           | 1.0%                    | 0.6%                | 2.4%              |                    |
| <b>Multiple Gestation</b>           | 15.1%                   | 16.0%               | 11.9%             | 0.633              |
| <b>ICG-Pregnancy</b>                | 34.4%                   | 36.4%               | 26.3%             | 0.259              |
| Polyhydramnios                      | 25.9%                   | 27.8%               | 18.4%             | 0.302              |
| Placentomegaly                      | 14.4%                   | 15.3%               | 10.5%             | 0.607              |
| <b>Preterm Birth (&lt;37 weeks)</b> | 40.9%                   | 40.5%               | 42.5%             | 0.859              |
| <b>Common Features</b>              |                         |                     |                   |                    |
| Macroglossia                        | 71.8%                   | 77.8%               | 47.6%             | <0.001***          |
| BWSp-LO                             | 73.8%                   | 72.0%               | 81.0%             | 0.325              |
| Ear creases/pits                    | 62.2%                   | 67.1%               | 42.1%             | 0.005**            |
| Facial Nevus Simplex                | 51.0%                   | 58.5%               | 20.5%             | <0.001***          |
| Large Size (LGA)                    | 63.5%                   | 63.6%               | 63.2%             | 1.000              |
| <b>Organomegaly</b>                 | 33.7%                   | 31.6%               | 41.5%             | 0.267              |
| Nephromegaly                        | 19.6%                   | 16.8%               | 30.0%             | 0.074              |
| Hepatomegaly                        | 19.8%                   | 19.6%               | 20.5%             | 1.000              |
| Splenomegaly                        | 14.5%                   | 13.6%               | 17.9%             | 0.456              |
| <b>Hypoglycemia</b>                 | 60.1%                   | 64.2%               | 43.9%             | 0.021*             |
| Severe (HI)                         | 20.9%                   | 21.4%               | 18.6%             | 0.834              |
| Transient                           | 38.4%                   | 42.0%               | 24.4%             | 0.048*             |
| <b>Abdominal Wall Defects</b>       | 70.1%                   | 75.0%               | 50.0%             | 0.003**            |
| Omphalocele                         | 24.1%                   | 26.6%               | 14.0%             | 0.109              |
| Minor defect                        | 45.1%                   | 47.6%               | 35.0%             | 0.162              |

NP=not performed.

<sup>1</sup> Difference by column proportion testing.

**Table B4.** Classic BWS Phenotype Population – Tumor Phenotype Comparisons.

| Classic BWS Population Characteristics | Classic BWS No Tumor (n=124) | Classic BWS Tumor (n=20) | p-value |
|----------------------------------------|------------------------------|--------------------------|---------|
| <b>Subtype Distributions</b>           |                              |                          |         |
| IC1 GOM (n=17)                         | 9                            | 6                        | NP      |
| IC2 LOM (n=94)                         | 90                           | 4                        |         |
| pUPD11 (n=35)                          | 25                           | 10                       |         |
| <b>Blood+</b>                          | 113/116                      | 20/20                    | 1.000   |
| <b>Male sex</b>                        | 60/124                       | 9/20                     | 0.814   |
| <b>Diversity Groups</b>                |                              |                          | 0.113   |
| ‘White/Caucasian’ only                 | 86/120                       | 10/20                    |         |
| ‘Mixed’ race/ethnicity                 | 21/120                       | 5/20                     |         |
| ‘Other’ race/ethnicity                 | 13/120                       | 5/20                     |         |
| <b>Conception Type</b>                 |                              |                          | 0.686   |
| Natural                                | 90/119                       | 16/19                    |         |
| IVF/ICSI                               | 28/119                       | 3/19                     |         |
| Other ART                              | 1/119                        | 0/19                     |         |
| <b>Multiple Gestation</b>              | 21/121                       | 4/20                     | 0.756   |
| <b>ICG-Pregnancy</b>                   | 52/112                       | 10/18                    | 0.612   |
| Polyhydramnios                         | 41/112                       | 7/18                     | 1.000   |
| Placentomegaly                         | 21/111                       | 4/18                     | 0.751   |
| <b>Preterm Birth (&lt;37 weeks)</b>    | 57/120                       | 16/20                    | 0.008** |
| <b>Common Features</b>                 |                              |                          |         |
| Macroglossia                           | 116/124                      | 19/20                    | 1.000   |
| BWSp-LO                                | 86/119                       | 15/20                    | 1.000   |
| Ear creases/pits                       | 94/114                       | 12/18                    | 0.123   |
| Facial Nevus Simplex                   | 81/117                       | 7/18                     | 0.017*  |
| Large Size (LGA)                       | 90/122                       | 15/19                    | 0.781   |
| <b>Organomegaly</b>                    | 44/115                       | 13/20                    | 0.030*  |
| Nephromegaly                           | 23/109                       | 10/19                    | 0.008** |
| Hepatomegaly                           | 26/108                       | 6/18                     | 0.394   |
| Splenomegaly                           | 18/107                       | 5/18                     | 0.323   |
| <b>Hypoglycemia</b>                    | 82/120                       | 14/20                    | 1.000   |
| Severe (HI)                            | 22/124                       | 7/20                     | 0.128   |
| Transient                              | 60/120                       | 7/20                     | 0.237   |
| <b>Abdominal Wall Defects</b>          | 105/120                      | 15/20                    | 0.166   |
| Omphalocele                            | 43/123                       | 6/20                     | 0.802   |
| Minor defect                           | 62/120                       | 9/20                     | 0.635   |

NP=not performed.

**Table B5.** Atypical BWSp / ILO Phenotypes Population – Tumor Phenotype Comparisons.

| Atypical BWSp / ILO<br>Population Characteristics | Atypical / ILO<br>No Tumor<br>(n=40) | Atypical / ILO<br>Tumor<br>(n=22) | p-value            |
|---------------------------------------------------|--------------------------------------|-----------------------------------|--------------------|
| <b>Subtype Distributions</b>                      |                                      |                                   |                    |
| IC1 GOM (n=15)                                    | 5                                    | 10                                | NP                 |
| IC2 LOM (n=12)                                    | 11                                   | 1                                 |                    |
| pUPD11 (n=35)                                     | 24                                   | 11                                |                    |
| <b>Blood+</b>                                     | 22/40                                | 6/21                              | 0.062 <sup>1</sup> |
| <b>Male sex</b>                                   | 17/40                                | 7/22                              | 0.586              |
| <b>Diversity Groups</b>                           |                                      |                                   | 0.247              |
| ‘White/Caucasian’ only                            | 25/40                                | 17/22                             |                    |
| ‘Mixed’ race/ethnicity                            | 7/40                                 | 4/22                              |                    |
| ‘Other’ race/ethnicity                            | 8/40                                 | 1/22                              |                    |
| <b>Conception Type</b>                            |                                      |                                   | 0.095              |
| Natural                                           | 32/37                                | 20/21                             |                    |
| IVF/ICSI                                          | 5/37                                 | 0/21                              |                    |
| Other ART                                         | 0/37                                 | 1/21                              |                    |
| <b>Multiple Gestation</b>                         | 5/38                                 | 1/21                              | 0.407              |
| <b>ICG-Pregnancy</b>                              | 3/38                                 | 0/20                              | 0.544              |
| Polyhydramnios                                    | 1/38                                 | 0/20                              | 1.000              |
| Placentomegaly                                    | 2/38                                 | 0/20                              | 0.540              |
| <b>Preterm Birth (&lt;37 weeks)</b>               | 9/39                                 | 1/20                              | 0.141              |
| <b>Common Features</b>                            |                                      |                                   |                    |
| Macroglossia                                      | 11/40                                | 1/22                              | 0.042*             |
| BWSp-LO                                           | 29/40                                | 18/21                             | 0.342              |
| Ear creases/pits                                  | 8/37                                 | 4/20                              | 1.000              |
| Facial Nevus Simplex                              | 9/39                                 | 1/21                              | 0.084              |
| Large Size (LGA)                                  | 15/39                                | 9/19                              | 0.578              |
| <b>Organomegaly</b>                               | 5/38                                 | 4/21                              | 0.708              |
| Nephromegaly                                      | 2/38                                 | 2/21                              | 0.611              |
| Hepatomegaly                                      | 3/38                                 | 2/21                              | 1.000              |
| Splenomegaly                                      | 1/38                                 | 2/21                              | 0.286              |
| <b>Hypoglycemia</b>                               | 20/39                                | 4/21                              | 0.026*             |
| Severe (HI)                                       | 14/40                                | 1/22                              | 0.011*             |
| Transient                                         | 6/39                                 | 3/21                              | 1.000              |
| <b>Abdominal Wall Defects</b>                     | 15/40                                | 5/20                              | 0.395              |
| Omphalocele                                       | 1/40                                 | 0/22                              | 1.000              |
| Minor defect                                      | 14/40                                | 5/20                              | 0.560              |

NP=not performed.

<sup>1</sup> Difference by column proportion testing.

**Table B6.** Lateralized Overgrowth Population (BWSp-LO) – Tumor Phenotype Comparisons.

| Lateralized Overgrowth (LO)<br>Characteristics | BWSp-LO<br>No Tumor<br>(n=118) | BWSp-LO<br>Tumor<br>(n=34) | p-value   |
|------------------------------------------------|--------------------------------|----------------------------|-----------|
| <b>Subtype Distributions</b>                   |                                |                            | <0.001*** |
| IC1 GOM (n=11)                                 | 10/118                         | 11/34                      |           |
| IC2 LOM (n=62)                                 | 60/118                         | 2/34                       |           |
| pUPD11 (n=69)                                  | 48/118                         | 21/34                      |           |
| <b>Blood+</b>                                  | 96/118                         | 19/34                      | 0.002**   |
| <b>Male sex</b>                                | 53/118                         | 14/34                      | 0.845     |
| <b>Diversity Groups</b>                        |                                |                            | 0.897     |
| ‘White/Caucasian’ only                         | 76/116                         | 21/34                      |           |
| ‘Mixed’ race/ethnicity                         | 23/116                         | 7/34                       |           |
| ‘Other’ race/ethnicity                         | 17/116                         | 6/34                       |           |
| <b>Conception Type</b>                         |                                |                            | 0.152     |
| Natural                                        | 87/109                         | 29/32                      |           |
| IVF/ICSI                                       | 21/109                         | 2/32                       |           |
| Other ART                                      | 1/109                          | 1/32                       |           |
| <b>Multiple Gestation</b>                      | 15/112                         | 3/33                       | 0.764     |
| <b>ICG-Pregnancy</b>                           | 31/109                         | 7/30                       | 0.649     |
| Polyhydramnios                                 | 22/108                         | 5/30                       | 0.797     |
| Placentomegaly                                 | 12/108                         | 3/30                       | 1.000     |
| <b>Preterm Birth (&lt;37 weeks)</b>            | 43/112                         | 13/31                      | 0.836     |
| <b>Common Features</b>                         |                                |                            |           |
| Macroglossia                                   | 84/118                         | 14/33                      | 0.004**   |
| Ear creases/pits                               | 74/111                         | 15/31                      | 0.092     |
| Facial Nevus Simplex                           | 61/111                         | 7/32                       | 0.001**   |
| Large Size (LGA)                               | 71/115                         | 19/30                      | 1.000     |
| <b>Organomegaly</b>                            | 31/107                         | 10/32                      | 0.827     |
| Nephromegaly                                   | 16/105                         | 7/32                       | 0.420     |
| Hepatomegaly                                   | 21/104                         | 5/31                       | 0.796     |
| Splenomegaly                                   | 15/104                         | 4/31                       | 1.000     |
| <b>Hypoglycemia</b>                            | 78/113                         | 14/32                      | 0.012*    |
| Severe (HI)                                    | 29/117                         | 7/34                       | 0.819     |
| Transient                                      | 49/113                         | 7/32                       | 0.039*    |
| <b>Abdominal Wall Defects</b>                  | 79/112                         | 12/32                      | 0.003*    |
| Omphalocele                                    | 22/116                         | 5/34                       | 0.800     |
| Minor defect                                   | 57/112                         | 8/32                       | 0.015*    |

**Table B7.** BWSp-Organomegaly Population – Tumor Phenotype Comparisons.

| Organomegaly Characteristics        | Organomegaly No Tumor (n=49) | Organomegaly Tumor (n=17) | p-value |
|-------------------------------------|------------------------------|---------------------------|---------|
| <b>Subtype Distributions</b>        |                              |                           | NP      |
| IC1 GOM (n=13)                      | 7                            | 6                         |         |
| IC2 LOM (n=31)                      | 29                           | 2                         |         |
| pUPD11 (n=22)                       | 13                           | 9                         |         |
| <b>Blood+</b>                       | 42/47                        | 15/16                     | 1.000   |
| <b>Male sex</b>                     | 31/49                        | 4/17                      | 0.010*  |
| <b>Diversity Groups</b>             |                              |                           | 0.043*  |
| ‘White/Caucasian’ only              | 33/46                        | 7/17                      |         |
| ‘Mixed’ race/ethnicity              | 5/46                         | 6/17                      |         |
| ‘Other’ race/ethnicity              | 8/46                         | 4/17                      |         |
| <b>Conception Type</b>              |                              |                           | 0.667   |
| Natural                             | 40/47                        | 15/16                     |         |
| IVF/ICSI                            | 7/47                         | 1/16                      |         |
| Other ART                           | 0/47                         | 0/16                      |         |
| <b>Multiple Gestation</b>           | 11/48                        | 3/17                      | 0.745   |
| <b>ICG-Pregnancy</b>                | 22/44                        | 6/15                      | 0.382   |
| Polyhydramnios                      | 20/44                        | 5/15                      | 0.548   |
| Placentomegaly                      | 9/44                         | 2/15                      | 0.712   |
| <b>Preterm Birth (&lt;37 weeks)</b> | 24/48                        | 9/17                      | 1.000   |
| <b>Common Features</b>              |                              |                           |         |
| Macroglossia                        | 43/49                        | 13/17                     | 0.267   |
| BWSp-LO                             | 16/49                        | 10/16                     | 1.000   |
| Ear creases/pits                    | 33/44                        | 7/14                      | 0.102   |
| Facial Nevus Simplex                | 23/47                        | 3/14                      | 0.122   |
| Large Size (LGA)                    | 34/47                        | 12/15                     | 0.739   |
| <b>Specific Organs Affected</b>     |                              |                           |         |
| Nephromegaly                        | 25/43                        | 12/16                     | 0.365   |
| Hepatomegaly                        | 29/42                        | 8/15                      | 0.349   |
| Splenomegaly                        | 15/41                        | 4/15                      | 0.543   |
| <b>Hypoglycemia</b>                 | 33/49                        | 10/17                     | 0.564   |
| Severe (HI)                         | 10/49                        | 5/17                      | 0.508   |
| Transient                           | 23/49                        | 5/17                      | 0.262   |
| <b>Abdominal Wall Defects</b>       | 41/47                        | 13/16                     | 0.681   |
| Omphalocele                         | 16/49                        | 4/17                      | 0.555   |
| Minor defect                        | 25/47                        | 9/16                      | 1.000   |

NP=not performed.



**Table B8.** Wilms Tumor (WT)-Tumor Phenotype Comparisons within BWSp Population.

| Population Characteristics          | No Tumor<br>(n=172) | BWSp-WT<br>(n=29) | p-value            |
|-------------------------------------|---------------------|-------------------|--------------------|
| <b>Subtype Distribution</b>         |                     |                   |                    |
| IC1 GOM (n=30)                      | 14                  | 16                | NP                 |
| IC2 LOM (n=109)                     | 107                 | 2                 |                    |
| pUPD11 (n=62)                       | 51                  | 11                |                    |
| <b>Blood+</b>                       | 143/164             | 15/28             | <0.001***          |
| <b>Male sex</b>                     | 80/172              | 10/29             | 0.313              |
| <b>Diversity Groups</b>             |                     |                   | 0.879              |
| ‘White/Caucasian’ only              | 113/166             | 19/29             |                    |
| ‘Mixed’ race/ethnicity              | 28/166              | 6/29              |                    |
| ‘Other’ race/ethnicity              | 25/166              | 4/29              |                    |
| <b>Conception Type</b>              |                     |                   | 0.081 <sup>1</sup> |
| Natural                             | 123/159             | 25/28             |                    |
| IVF/ICSI                            | 35/159              | 2/28              |                    |
| Other ART                           | 1/159               | 1/28              |                    |
| <b>Multiple Gestation</b>           | 26/163              | 2/28              | 0.383              |
| <b>ICG-Pregnancy</b>                | 55/151              | 5/27              | 0.080              |
| Polyhydramnios                      | 42/151              | 3/27              | 0.091              |
| Placentomegaly                      | 23/150              | 2/27              | 0.377              |
| <b>Preterm Birth (&lt;37 weeks)</b> | 66/163              | 8/27              | 0.394              |
| <b>Common Features</b>              |                     |                   |                    |
| Macroglossia                        | 133/171             | 10/29             | <0.001***          |
| BWSp-LO                             | 118/164             | 21/28             | 0.823              |
| Ear creases/pits                    | 104/155             | 7/26              | <0.001***          |
| Facial Nevus Simplex                | 93/159              | 4/27              | <0.001***          |
| Large Size (LGA)                    | 105/165             | 14/26             | 0.386              |
| <b>Organomegaly</b>                 | 49/155              | 10/28             | 0.666              |
| Nephromegaly                        | 25/149              | 7/27              | 0.280              |
| Hepatomegaly                        | 29/148              | 6/27              | 0.795              |
| Splenomegaly                        | 20/147              | 6/27              | 0.248              |
| <b>Hypoglycemia</b>                 | 104/162             | 10/28             | 0.006**            |
| Severe (HI)                         | 36/168              | 1/29              | 0.020*             |
| Transient                           | 68/162              | 9/28              | 0.406              |
| <b>Abdominal Wall Defects</b>       | 123/164             | 9/27              | <0.001***          |
| Omphalocele                         | 45/169              | 0/29              | <0.001***          |
| Minor defect                        | 78/164              | 9/27              | 0.212              |

NP=not performed.

<sup>1</sup> Difference by column proportion testing.

**Table B9.** Hepatoblastoma (HB)-Tumor Phenotype Comparisons within BWSp Population.

| Population Characteristics          | No Tumor<br>(n=172) | BWSp-HB<br>(n=11) | p-value            |
|-------------------------------------|---------------------|-------------------|--------------------|
| <b>Subtype Distribution</b>         |                     |                   |                    |
| IC1 GOM (n=14)                      | 14                  | -                 | NP                 |
| IC2 LOM (n=109)                     | 107                 | 2                 |                    |
| pUPD11 (n=60)                       | 51                  | 9                 |                    |
| <b>Blood+</b>                       | 143/164             | 11/11             | 0.365              |
| <b>Male sex</b>                     | 80/172              | 5/11              | 1.000              |
| <b>Diversity Groups</b>             |                     |                   | 0.611              |
| ‘White/Caucasian’ only              | 113/166             | 6/11              |                    |
| ‘Mixed’ race/ethnicity              | 28/166              | 3/11              |                    |
| ‘Other’ race/ethnicity              | 25/166              | 2/11              |                    |
| <b>Conception Type</b>              |                     |                   | 0.640              |
| Natural                             | 123/159             | 9/10              |                    |
| IVF/ICSI                            | 35/159              | 1/10              |                    |
| Other ART                           | 1/159               | 0/10              |                    |
| <b>Multiple Gestation</b>           | 26/163              | 2/11              | 0.691              |
| <b>ICG-Pregnancy</b>                | 55/151              | 4/8               | 0.470              |
| Polyhydramnios                      | 42/151              | 3/8               | 0.688              |
| Placentomegaly                      | 23/150              | 2/8               | 0.613              |
| <b>Preterm Birth (&lt;37 weeks)</b> | 66/163              | 8/10              | 0.020*             |
| <b>Common Features</b>              |                     |                   |                    |
| Macroglossia                        | 133/171             | 9/10              | 0.692              |
| BWSp-LO                             | 118/164             | 11/11             | 0.069 <sup>1</sup> |
| Ear creases/pits                    | 104/155             | 9/9               | 0.058 <sup>1</sup> |
| Facial Nevus Simplex                | 93/159              | 4/9               | 0.496              |
| Large Size (LGA)                    | 105/165             | 8/9               | 0.163              |
| <b>Organomegaly</b>                 | 49/155              | 6/10              | 0.085              |
| Nephromegaly                        | 25/149              | 4/10              | 0.085              |
| Hepatomegaly                        | 29/148              | 2/9               | 1.000              |
| Splenomegaly                        | 20/147              | 1/9               | 1.000              |
| <b>Hypoglycemia</b>                 | 104/162             | 7/10              | 1.000              |
| Severe (HI)                         | 36/168              | 6/11              | 0.022*             |
| Transient                           | 68/162              | 1/10              | 0.052 <sup>1</sup> |
| <b>Abdominal Wall Defects</b>       | 123/164             | 9/10              | 0.454              |
| Omphalocele                         | 45/169              | 5/11              | 0.182              |
| Minor defect                        | 78/164              | 4/10              | 0.751              |

NP=not performed.

<sup>1</sup> Difference by column proportion testing.

**Table B10.** IC1 GOM Population – Tumor Phenotype Comparisons.

| IC1 GOM Characteristics             | IC1 GOM – No Tumor<br>(n=14) | IC1 GOM Tumor<br>(n=16) | p-value            |
|-------------------------------------|------------------------------|-------------------------|--------------------|
| <b>Blood+</b>                       | 13/14 <sup>1</sup>           | 9/15 <sup>1</sup>       | 0.080 <sup>1</sup> |
| <b>Male sex</b>                     | 7/14                         | 5/16                    | 0.457              |
| <b>Diversity Groups</b>             |                              |                         | 0.297              |
| ‘White/Caucasian’ only              | 11/13                        | 10/16                   |                    |
| ‘Mixed’ race/ethnicity              | 2/13                         | 4/16                    |                    |
| ‘Other’ race/ethnicity              | 0/13                         | 2/16                    |                    |
| <b>Conception Type</b>              |                              |                         | 0.669              |
| Natural                             | 11/12                        | 14/16                   |                    |
| IVF/ICSI                            | 0/12                         | 1/16                    |                    |
| Other ART                           | 1/12                         | 1/16                    |                    |
| <b>Multiple Gestation</b>           | 2/13                         | 1/15                    | 0.585              |
| <b>ICG-Pregnancy</b>                | 7/13                         | 2/14                    | 0.046*             |
| Polyhydramnios                      | 6/13                         | 0/14                    | 0.006**            |
| Placentomegaly                      | 1/13                         | 2/14                    | 1.000              |
| <b>Preterm Birth (&lt;37 weeks)</b> | 6/13                         | 6/15                    | 1.000              |
| <b>Common Features</b>              |                              |                         |                    |
| Macroglossia                        | 10/14                        | 7/16                    | 0.159              |
| BWSp-LO                             | 10/13                        | 11/15                   | 1.000              |
| Ear creases/pits                    | 4/12                         | 4/13                    | 1.000              |
| Facial Nevus Simplex                | 2/11                         | 3/14                    | 1.000              |
| Large Size (LGA)                    | 8/13                         | 9/13                    | 1.000              |
| <b>Organomegaly</b>                 | 7/12                         | 6/15                    | 0.449              |
| Nephromegaly                        | 5/12                         | 3/14                    | 0.401              |
| Hepatomegaly                        | 5/12                         | 4/14                    | 0.683              |
| Splenomegaly                        | 4/12                         | 1/14                    | 0.148              |
| <b>Hypoglycemia</b>                 | 8/13                         | 6/16                    | 0.272              |
| Severe (HI)                         | 3/14                         | 0/16                    | 0.090              |
| Transient                           | 5/13                         | 6/16                    | 1.000              |
| <b>Abdominal Wall Defects</b>       | 11/14 <sup>1</sup>           | 5/14 <sup>1</sup>       | 0.054 <sup>1</sup> |
| Omphalocele                         | 0/14                         | 0/16                    | n/a                |
| Minor defect                        | 11/14 <sup>1</sup>           | 5/14 <sup>1</sup>       | 0.054 <sup>1</sup> |

n/a=not applicable.

<sup>1</sup> Difference by column proportion testing.

**Table B11.** Tumor Phenotype Comparisons within IC2 LOM Population.

| IC2 LOM Characteristics             | IC2 LOM – No Tumor<br>(n=107) | IC2 LOM Tumor<br>(n=5) | p-value            |
|-------------------------------------|-------------------------------|------------------------|--------------------|
| <b>Blood+</b>                       | 99/101                        | 5/5                    | 1.000              |
| <b>Male sex</b>                     | 49/107                        | 2/5                    | 1.000              |
| <b>Diversity Groups</b>             |                               |                        | 0.343              |
| ‘White/Caucasian’ only              | 71/102                        | 5/5                    |                    |
| ‘Mixed’ race/ethnicity              | 18/102                        | 0/5                    |                    |
| ‘Other’ race/ethnicity              | 13/102                        | 0/5                    |                    |
| <b>Conception Type</b>              |                               |                        | 0.652              |
| Natural                             | 70/102                        | 3/5                    |                    |
| IVF/ICSI                            | 32/102                        | 2/5                    |                    |
| Other ART                           | 0/102                         | 0/5                    |                    |
| <b>Multiple Gestation</b>           | 19/103 <sup>1</sup>           | 3/5 <sup>1</sup>       | 0.056 <sup>1</sup> |
| <b>ICG-Pregnancy</b>                | 39/91                         | 4/5                    | 0.170              |
| Polyhydramnios                      | 30/91                         | 3/5                    | 0.335              |
| Placentomegaly                      | 18/90                         | 1/5                    | 1.000              |
| <b>Preterm Birth (&lt;37 weeks)</b> | 49/102                        | 4/5                    | 0.205              |
| <b>Common Features</b>              |                               |                        |                    |
| Macroglossia                        | 103/107                       | 4/5                    | 0.208              |
| BWSp-LO                             | 60/101                        | 2/5                    | 0.647              |
| Ear creases/pits                    | 78/96 <sup>1</sup>            | 2/5 <sup>1</sup>       | 0.059 <sup>1</sup> |
| Facial Nevus Simplex                | 74/100                        | 2/5                    | 0.128              |
| Large Size (LGA)                    | 66/103                        | 2/5                    | 0.357              |
| <b>Organomegaly</b>                 | 29/97                         | 2/5                    | 0.638              |
| Nephromegaly                        | 14/92                         | 2/5                    | 0.189              |
| Hepatomegaly                        | 13/91                         | 0/5                    | 1.000              |
| Splenomegaly                        | 10/90                         | 2/5                    | 0.118              |
| <b>Hypoglycemia</b>                 | 56/100                        | 3/5                    | 1.000              |
| Severe (HI)                         | 12/105                        | 1/5                    | 0.473              |
| Transient                           | 44/100                        | 2/5                    | 1.000              |
| <b>Abdominal Wall Defects</b>       | 84/101                        | 5/5                    | 1.000              |
| Omphalocele                         | 43/107                        | 3/5                    | 0.400              |
| Minor defect                        | 41/101                        | 2/5                    | 1.000              |

<sup>1</sup> Difference by column proportion testing.

**Table B12.** Tumor Phenotype Comparisons within pUPD11 Population.

| <b>pUPD11 Population Characteristics</b> | <b>pUPD11 No Tumor (n=51)</b> | <b>pUPD11 Tumor (n=22)</b> | <b>p-value</b> |
|------------------------------------------|-------------------------------|----------------------------|----------------|
| <b>Blood+</b>                            | 31/49                         | 13/22                      | 0.795          |
| <b>Male sex</b>                          | 24/51                         | 9/22                       | 0.798          |
| <b>Diversity Groups</b>                  |                               |                            | 0.728          |
| 'White/Caucasian' only                   | 31/51                         | 13/22                      |                |
| 'Mixed' race/ethnicity                   | 8/51                          | 5/22                       |                |
| 'Other' race/ethnicity                   | 12/51                         | 4/22                       |                |
| <b>Conception Type</b>                   |                               |                            | 0.547          |
| Natural                                  | 42/45                         | 20/20                      |                |
| IVF/ICSI                                 | 3/45                          | 0/20                       |                |
| Other ART                                | 0/45                          | 0/20                       |                |
| <b>Multiple Gestation</b>                | 5/47                          | 1/22                       | 0.656          |
| <b>ICG-Pregnancy</b>                     | 9/47                          | 4/19                       | 1.000          |
| Polyhydramnios                           | 6/47                          | 4/19                       | 0.456          |
| Placentomegaly                           | 4/47                          | 1/19                       | 1.000          |
| <b>Preterm Birth (&lt;37 weeks)</b>      | 11/48                         | 7/20                       | 0.370          |
| <b>Common Features</b>                   |                               |                            |                |
| Macroglossia                             | 20/50                         | 9/21                       | 1.000          |
| BWSp-LO                                  | 48/50                         | 21/22                      | 1.000          |
| Ear creases/pits                         | 22/47                         | 10/20                      | 1.000          |
| Facial Nevus Simplex                     | 17/48                         | 3/20                       | 0.144          |
| Large Size (LGA)                         | 31/49                         | 13/20                      | 1.000          |
| <b>Organomegaly</b>                      | 13/46                         | 9/21                       | 0.271          |
| Nephromegaly                             | 6/45                          | 7/21                       | 0.094          |
| Hepatomegaly                             | 11/45                         | 4/20                       | 0.761          |
| Splenomegaly                             | 6/45                          | 4/20                       | 0.482          |
| <b>Hypoglycemia</b>                      | 40/49                         | 9/20                       | 0.004**        |
| Severe (HI)                              | 21/49                         | 7/22                       | 0.439          |
| Transient                                | 19/49                         | 2/20                       | 0.022*         |
| <b>Abdominal Wall Defects</b>            | 28/49                         | 10/21                      | 0.602          |
| Omphalocele                              | 2/48                          | 3/22                       | 0.316          |
| Minor defect                             | 26/49                         | 7/21                       | 0.192          |

**Table B13.** Wilms Tumor (WT)-Tumor Phenotype Comparisons within pUPD11 Population.

| <b>pUPD11 Population Characteristics</b> | <b>pUPD11 No Tumor (n=51)</b> | <b>pUPD11-WT (n=11)</b> | <b>p-value</b> |
|------------------------------------------|-------------------------------|-------------------------|----------------|
| <b>Blood+</b>                            | 31/49                         | 4/11                    | 0.174          |
| <b>Male sex</b>                          | 24/51                         | 5/11                    | 1.000          |
| <b>Diversity Groups</b>                  |                               |                         | 0.922          |
| 'White/Caucasian' only                   | 31/51                         | 7/11                    |                |
| 'Mixed' race/ethnicity                   | 8/51                          | 2/11                    |                |
| 'Other' race/ethnicity                   | 12/51                         | 2/11                    |                |
| <b>Conception Type</b>                   |                               |                         | 1.000          |
| Natural                                  | 42/45                         | 10/10                   |                |
| IVF/ICSI                                 | 3/45                          | 0/10                    |                |
| Other ART                                | 0/45                          | 0/10                    |                |
| <b>Multiple Gestation</b>                | 5/47                          | 0/11                    | 0.572          |
| <b>ICG-Pregnancy</b>                     | 9/47                          | 2/11                    | 1.000          |
| Polyhydramnios                           | 6/47                          | 2/11                    | 0.639          |
| Placentomegaly                           | 4/47                          | 0/11                    | 1.000          |
| <b>Preterm Birth (&lt;37 weeks)</b>      | 11/48                         | 1/10                    | 0.670          |
| <b>Common Features</b>                   |                               |                         |                |
| Macroglossia                             | 20/50                         | 2/11                    | 0.299          |
| BWSp-LO                                  | 48/50                         | 10/11                   | 0.455          |
| Ear creases/pits                         | 22/47                         | 3/11                    | 0.320          |
| Facial Nevus Simplex                     | 17/48                         | 0/11                    | 0.024*         |
| Large Size (LGA)                         | 31/49                         | 5/11                    | 0.321          |
| <b>Organomegaly</b>                      | 13/46                         | 3/11                    | 1.000          |
| Nephromegaly                             | 6/45                          | 3/11                    | 0.358          |
| Hepatomegaly                             | 11/45                         | 2/11                    | 1.000          |
| Splenomegaly                             | 6/45                          | 4/11                    | 0.093          |
| <b>Hypoglycemia</b>                      | 40/49                         | 3/10                    | 0.002**        |
| Severe (HI)                              | 21/49                         | 1/11                    | 0.043*         |
| Transient                                | 19/49                         | 2/10                    | 0.470          |
| <b>Abdominal Wall Defects</b>            | 28/49                         | 2/11                    | 0.042*         |
| Omphalocele                              | 2/48                          | 0/11                    | 1.000          |
| Minor defect                             | 26/49                         | 2/11                    | 0.048*         |

**Table B14.** Hepatoblastoma (HB)-Tumor Phenotype Comparisons within pUPD11 Population.

| <b>pUPD11 Population Characteristics</b> | <b>pUPD11 No Tumor (n=51)</b> | <b>pUPD11-HB (n=9)</b> | <b>p-value</b> |
|------------------------------------------|-------------------------------|------------------------|----------------|
| <b>Blood+</b>                            | 31/49                         | 9/9                    | 0.045*         |
| <b>Male sex</b>                          | 24/51                         | 3/9                    | 0.495          |
| <b>Diversity Groups</b>                  |                               |                        | 0.437          |
| 'White/Caucasian' only                   | 31/51                         | 4/9                    |                |
| 'Mixed' race/ethnicity                   | 8/51                          | 3/9                    |                |
| 'Other' race/ethnicity                   | 12/51                         | 2/9                    |                |
| <b>Conception Type</b>                   |                               |                        | 1.000          |
| Natural                                  | 42/45                         | 8/8                    |                |
| IVF/ICSI                                 | 3/45                          | 0/8                    |                |
| Other ART                                | 0/45                          | 0/8                    |                |
| <b>Multiple Gestation</b>                | 5/47                          | 1/9                    | 1.000          |
| <b>ICG-Pregnancy</b>                     | 9/47                          | 2/6                    | 0.592          |
| Polyhydramnios                           | 6/47                          | 2/6                    | 0.219          |
| Placentomegaly                           | 4/47                          | 1/6                    | 0.465          |
| <b>Preterm Birth (&lt;37 weeks)</b>      | 11/48                         | 6/8                    | 0.007**        |
| <b>Common Features</b>                   |                               |                        |                |
| Macroglossia                             | 20/50                         | 7/8                    | 0.020*         |
| BWSp-LO                                  | 48/50                         | 9/9                    | 1.000          |
| Ear creases/pits                         | 22/47                         | 7/7                    | 0.012*         |
| Facial Nevus Simplex                     | 17/48                         | 3/7                    | 0.696          |
| Large Size (LGA)                         | 31/49                         | 6/7                    | 0.403          |
| <b>Organomegaly</b>                      | 13/46                         | 6/8                    | 0.017*         |
| Nephromegaly                             | 6/45                          | 4/8                    | 0.033*         |
| Hepatomegaly                             | 11/45                         | 2/7                    | 1.000          |
| Splenomegaly                             | 6/45                          | 0/7                    | 0.580          |
| <b>Hypoglycemia</b>                      | 40/49                         | 5/8                    | 0.345          |
| Severe (HI)                              | 21/49                         | 5/9                    | 0.717          |
| Transient                                | 19/49                         | 0/8                    | 0.042*         |
| <b>Abdominal Wall Defects</b>            | 28/49                         | 7/8                    | 0.134          |
| Omphalocele                              | 2/48                          | 3/9                    | 0.024*         |
| Minor defect                             | 26/49                         | 4/8                    | 1.000          |

**Table B15.** Patients selected for series: Results from 2019 BWS Registry cohort and 2020 BWSp Research Network database queries.

| Patient ID | Database Identified | Search Criteria Matched <sup>1</sup> |   |   |   |    | Criteria Match Count | Profile Eligibility |                  |                                              |
|------------|---------------------|--------------------------------------|---|---|---|----|----------------------|---------------------|------------------|----------------------------------------------|
|            |                     | A                                    | B | C | D | E  |                      | BWSp Phenotype      | BWSp Epigenotype | Cancer Type Previously Reported <sup>2</sup> |
| #01        | 2019 cohort         | +                                    | + | - | - | +  | 3/5                  | +                   | +                | +                                            |
| #02        | 2019 cohort         | +                                    | + | + | + | -  | 4/5                  | +                   | +                | +                                            |
| #03        | 2019 cohort         | +                                    | - | - | + | -  | 2/5                  | +                   | +                | Unreported (New)                             |
| #04        | BWSp Network        | +                                    | + | - | + | -  | 3/5                  | +                   | +                | +                                            |
| #05        | 2019 cohort         | +                                    | - | - | - | -  | 1/5                  | +                   | +                | +                                            |
| #06        | BWSp Network        | +                                    | + | - | - | -  | 2/5                  | L                   | +                | +                                            |
| #07        | 2019 cohort         | -                                    | + | - | - | +  | 2/5                  | +                   | +                | +                                            |
| #08        | 2019 cohort         | -                                    | + | - | - | +  | 2/5                  | +                   | +                | +                                            |
| #09        | 2019 cohort         | -                                    | + | - | - | +  | 2/5                  | +                   | +                | +                                            |
| #10        | BWSp Network        | -                                    | + | - | - | -  | 1/5                  | +                   | +                | +                                            |
| #11        | 2019 cohort         | -                                    | + |   | - | -  | 1/4                  | L                   | +                | +                                            |
| #12        | 2019 cohort         | -                                    | + | - | - | -  | 1/5                  | +                   | +                | Unreported (New)                             |
| #13        | 2019 cohort         | -                                    | - | + | - | -  | 1/5                  | +                   | +                | +                                            |
| #14        | BWSp Network        | -                                    | - | + |   | -  | 1/4                  | L                   | +                | +                                            |
| #15        | BWSp Network        | -                                    | + | - |   | -  | 1/4                  | L                   | +                | +                                            |
| #16        | BWSp Network        | +                                    | + | - | + | -  | 3/5                  | +                   | +                | Unreported (New)                             |
| #17        | 2019 cohort         | -                                    | - | + | + | -  | 2/5                  | +                   | +                | +                                            |
| #18        | BWSp Network        | +                                    | + | - | - | -  | 2/5                  | +                   | +                | Unreported (New)                             |
| #19        | 2019 cohort         | -                                    | + | - | + | +  | 3/5                  | +                   | +                | +                                            |
| #20        | BWSp Network        | -                                    | - | + | + | -  | 2/5                  | +                   | +                | +                                            |
| #21        | 2019 cohort         | -                                    | - | - | - | ++ | 1/5                  | +                   | +                | Unreported (New)                             |
| #22        | 2019 cohort         | +                                    | - | + | + | -  | 3/5                  | +                   | R                | +                                            |
| #23        | 2019 cohort         | -                                    | + | - | - | +  | 2/5                  | +                   | L                | +                                            |
| #24        | 2019 cohort         | -                                    | + | - | - | -  | 1/5                  | +                   | L                | +                                            |
| #25        | 2019 cohort         | -                                    | + | - | - |    | 1/4                  | +                   | R                | +                                            |
| #26        | 2019 cohort         | -                                    | - | - | - | +  | 1/5                  | +                   | R                | +                                            |

<sup>1</sup> Search Criteria: A=Tumor-IC2 LOM-tumor; B=HB tumor type; C=Tumor-ART conception; D=Tumor-Multiple gestation; E=Tumor-Hyperinsulinism (HI).

<sup>2</sup> Patients previously included in cohorts evaluating HB or WT in BWSp marked with (+); Tumor types or patients with HB or WT not included in previous cohorts are highlighted (New).

Table Abbreviations and Symbols: (+)=Yes; (-)=No; L=Limited (incomplete); R=Reported (outside labs).



**Table B16.** Common Characteristics and Phenotype Patterns Observed in Selected Patients with BWSp and Tumor Development.

| ID  | ART and/or Twinning Hx <sup>1</sup> | BWSp Diagnosis Pre-Tumor | Organ and/or GU Anomalies | Macroglossia Severity <sup>2</sup> | Craniofacial Features | Abdominal Wall Defect (AWD)    | Hypoglycemia Severity  | LO <sup>3</sup> |
|-----|-------------------------------------|--------------------------|---------------------------|------------------------------------|-----------------------|--------------------------------|------------------------|-----------------|
| #01 | - / -                               | +                        | +                         | ++                                 | +                     | Omphalocele                    | HI                     | +               |
| #02 | + / +                               | +                        | +                         | +++                                | +                     | Omphalocele                    | Transient              | +               |
| #03 | - / +                               | +                        | +                         | ++                                 | +                     | Omphalocele                    | No                     | No              |
| #04 | - / +                               | +                        | -                         | +                                  | +                     | Umbilical Hernia               | No                     | No              |
| #05 | +Fam Hx / -                         | Post-WT                  | Not known prior to WT     | No                                 | No                    | Umbilical Hernia               | No                     | No              |
| #07 | - / -                               | +                        | +                         | +++                                | +                     | Omphalocele                    | HI                     | +++             |
| #08 | +Fam Hx / -                         | +                        | +                         | +++                                | +                     | Umbilical Hernia               | HI                     | +++             |
| #09 | - / -                               | +                        | +                         | +++                                | +                     | Umbilical cord cyst (in-utero) | HI                     | +++             |
| #10 | - / +                               | +                        | No                        | No                                 | +                     | Umbilical Hernia               | Transient              | ++              |
| #12 | - / -                               | C <sup>4</sup>           | Not known prior to HB     | +                                  | +                     | Umbilical Hernia               | No                     | +               |
| #13 | + / -                               | +                        | No                        | +                                  | +                     | No                             | No                     | ++              |
| #16 | - / +                               | Post-HB                  | Not known prior to HB     | No                                 | +                     | No                             | No                     | +               |
| #17 | + / +                               | Post-WT                  | +                         | ?*                                 | +                     | Umbilical Hernia               | No                     | +               |
| #18 | - / -                               | +                        | -                         | +                                  | +                     | No                             | No                     | +               |
| #19 | - / +                               | +                        | +                         | +++                                | +                     | Omphalocele                    | HI                     | +++             |
| #20 | + / +                               | +                        | +                         | No                                 | +                     | No                             | No                     | ++              |
| #21 | - / -                               | C <sup>1</sup>           | No                        | No                                 | +                     | No                             | HI (Panc) <sup>5</sup> | +               |
| #22 | + / +                               | Post-WT                  | +                         | +                                  | +                     | Diastasis Recti                | Transient              | No              |
| #23 | - / -                               | +                        | +                         | ++                                 | +                     | Umbilical Hernia               | HI                     | +++             |
| #24 | - / +                               | +                        | No                        | No                                 | +                     | Umbilical Hernia               | Transient              | +++             |
| #25 | - / -                               | +                        | +                         | ++                                 | +                     | Omphalocele                    | unknown                | +++             |
| #26 | - / -                               | +                        | +                         | ++                                 | +                     | Umbilical Hernia               | HI                     | No              |

<sup>1</sup> History of ART conception or twinning (+)yes, (-)no; Patients #05 and #08 (females) were naturally conceived, but had an older brother conceived using ART (no family history of BWSp for either patients).

<sup>2</sup> Lateralized Overgrowth (LO) Severity Scale: (+)=Mild asymmetry; (++)=Obvious asymmetry and/or LLD (leg length discrepancy); (+++)=Severe asymmetry/LO.

<sup>3</sup> Macroglossia Severity Scale: (+)=Mild macroglossia (*no surgery needed or projected at last follow-up*); (++)=Macroglossia requiring tongue reduction (TR) >1 year of age; (+++)=Severe macroglossia (TR < 1 year of age required for management).

<sup>4</sup> C = concordant with suspected BWSp diagnosis (HB detected on first screen during diagnostic work-up).

<sup>5</sup> HI (Panc)=Severe Hyperinsulinism requiring pancreatectomy for management.

**Table B17.** Summary of Common Characteristics Observed in Patients with Twinning or Higher Order Gestation.

| Patient ID                      | Conception                       | Twinning                                            | Major Pregnancy Complications                                          | Birth Outcome                           | Gest. Age (weeks)     | BWSp Diagnosis        | Subtype          | Tumor |
|---------------------------------|----------------------------------|-----------------------------------------------------|------------------------------------------------------------------------|-----------------------------------------|-----------------------|-----------------------|------------------|-------|
| <b>Female Twins or Triplets</b> |                                  |                                                     |                                                                        |                                         |                       |                       |                  |       |
| #03 (Female)                    | Natural                          | MZ Triplets (monochor-triamniotic)                  | TRAP sequence (proband=donor to acardic fetus)                         | Discordant MZ Twins +PMD                | 27 <sup>3/7</sup> wks | Prenatal              | IC2 LOM (blood)  | NBL   |
| #04 (Female)                    | Natural                          | Triplets<br>MZ twins/Singleton (Dichor-Triamniotic) | TTTS of MZ twins (proband=donor)<br>IUFD of twin (23 wks)              | DZ Twins                                | 30 <sup>6/7</sup> wks | Birth                 | IC2 LOM (blood)  | HB    |
| #16 (Female)                    | Natural                          | MZ Twins (monochorionic-diamniotic)                 | TTTS @ 23 wks (proband=recipient)<br>IUFD of twin (25 wks)             | Singleton<br>GA=26 4/7 wks              | 26 <sup>4/7</sup> wks | Post-HB               | IC2 LOM (tissue) | HB    |
| #22 (Female)                    | IVF                              | MZ Twins (diamniotic)                               | TTTS @19-20 wks (proband=recipient)<br>Pre-Eclampsia                   | Discordant MZ Twins (+CAKUT in proband) | 35 <sup>3/7</sup> wks | Post-WT               | IC2 LOM (blood)  | WT    |
| <b>Male-Male Twins</b>          |                                  |                                                     |                                                                        |                                         |                       |                       |                  |       |
| #02 (Male)                      | Clomp stim +IVF-ICSI (donor egg) | Twins (Discordant)                                  | Bleeding, Pre-Eclampsia, Placenta Previa +Polyhydramnios               | Discordant Twins<br>GA= 28 6/7          | 28 <sup>6/7</sup> wks | Prenatal confirmation | IC2 LOM (blood)  | HB    |
| #17 (Male)                      | Clomp stim                       | Twins (di-di)                                       | Hydronephrosis (proband @24 wks)<br>Pre-Eclampsia<br>No Polyhydramnios | Discordant Twins (+CAKUT in proband)    | 35 <sup>5/7</sup> wks | Post-WT               | IC1 GOM (tissue) | WT    |
| #19 (Male)                      | Natural                          | Twins (Discordant)                                  | Limited prenatal history available (+Omphalocele)                      | Discordant Twins                        | 33 wks                | Birth                 | pUPD11 (blood)   | HB    |
| <b>Female-Male Twins</b>        |                                  |                                                     |                                                                        |                                         |                       |                       |                  |       |
| #20 (Female)                    | IVF                              | Twins (Discordant)                                  | No issues reported                                                     | Discordant Twins                        | 34 wks                | Infancy (LO)          | IC1 GOM (tissue) | WT    |
| <b>Unknown Twin Sex</b>         |                                  |                                                     |                                                                        |                                         |                       |                       |                  |       |
| #10 (Male)                      | Natural                          | Vanishing embryo                                    | No major issues (LGA)                                                  | Singleton +Placentomegaly               | 39 <sup>3/7</sup> wks | Infancy (LO+)         | pUPD11 (blood)   | HB    |
| #24 (Female)                    | Natural                          | Empty sac <sup>1</sup>                              | No major issues (LGA)                                                  | Singleton                               | 38 wks                | Neonatal (LO+)        | pUPD11 (blood)   | HB    |

<sup>1</sup> Patient's direct older siblings are twins (male-female) without BWSp.

*Uncommon Table Abbreviations:* CAKUT=congenital anomaly of the kidney and/or urinary tract; IUFD=intrauterine fetal demise; MZ=monozygotic; TTTS=Twin-Twin Transfusion Syndrome; TRAP=Twin Reversed Arterial Perfusion (TRAP) Sequence

**Table S1.** Characteristics Associated with Multiple Tumor Development in Patients with BWSp due to pUPD11.

|                                              | Patient #07                                                               | Patient #08                                                              | Patient #19                                                                                      |
|----------------------------------------------|---------------------------------------------------------------------------|--------------------------------------------------------------------------|--------------------------------------------------------------------------------------------------|
| <b>Demographic Characteristics</b>           |                                                                           |                                                                          |                                                                                                  |
| Patient Sex                                  | Female                                                                    | Female                                                                   | Male                                                                                             |
| Diversity Group                              | Mixed race/ethnicity                                                      | White (non-Hispanic)                                                     | Mixed race/ethnicity ( <i>suspected</i> )                                                        |
| <b>Prenatal Phenotype</b>                    | Severe BWSp                                                               | Severe Anomalies                                                         | Severe BWSp                                                                                      |
| Prenatal Nephromegaly                        | Yes                                                                       | Yes                                                                      | Unknown <sup>1</sup>                                                                             |
| <b>Conception Profile</b>                    | Natural conception                                                        | Natural conception<br>+ART in older brother                              | Natural (assumed)                                                                                |
| <b>Twinning</b>                              | No report of vanishing twin                                               | No report of vanishing twin                                              | Male Twins (discordant)                                                                          |
| <b>Gestational Age</b>                       | 32 <sup>1/7</sup> weeks                                                   | 33 <sup>1/7</sup> weeks                                                  | 33 weeks                                                                                         |
| <b>11p15 Cell Burden (Blood)</b>             | 65-70% pUPD11                                                             | ~65% pUPD11                                                              | 50-55% pUPD11                                                                                    |
| <b>BWSp Clinical Score</b>                   | 11 (Severe BWSp)                                                          | 11 (Severe BWSp)                                                         | 12 (Severe BWSp)                                                                                 |
| <b>Abdominal Wall Defect</b>                 | Omphalocele                                                               | Umbilical Hernia                                                         | Omphalocele                                                                                      |
| <b>Hyperinsulinism (HI)</b>                  | Yes (resolved)                                                            | Yes (resolved)                                                           | Severe (persistent)                                                                              |
| <b>Macroglossia Profile</b>                  | Severe - Thick<br>(TR age <1 year)                                        | Severe - Thick<br>(TR age <6 months)                                     | Severe - Thick<br>(three TRs)                                                                    |
| <b>Lateralized Overgrowth</b>                | Severe (Full Body)<br>Right > Left                                        | Severe (Full Body)<br>Left > Right                                       | Yes (Full Body)<br>Left > Right                                                                  |
| Largest Girth Difference <sup>2</sup>        | ~25% (Thighs)                                                             | ~15% (Forearms)                                                          | ~5-10% (Forearm, Palms)                                                                          |
| <b>Neonatal Kidney Findings</b>              | Echogenic with diffuse<br>bilateral enlargement<br>(possible microcysts)  | Asymmetric kidney size with<br>bilateral fetal lobulation<br>(no masses) | Echogenic and enlarged<br>(cystic)                                                               |
| <b>Hepatoblastoma (HB) Tumor Development</b> |                                                                           |                                                                          |                                                                                                  |
| Age at First HB Detection                    | <b>6 months (HB)</b>                                                      | <b>2 months (HB)</b>                                                     | <b>4 months (HB)</b>                                                                             |
| <i>Diagnosis Comments</i>                    | <i>3 distinct lesions</i>                                                 | <i>Large solid mass</i>                                                  | <i>3 distinct lesions</i>                                                                        |
| Second HB Detection                          | <b>No additional HB<br/>developed through<br/>last follow-up</b>          | <b>14 months (HB)</b>                                                    | <b>31 months (HB)</b>                                                                            |
| Characteristics                              |                                                                           | Second Primary<br>(~1 year post initial<br>HB treatment)                 | Recurrence<br>(~2 years post initial<br>HB resection)                                            |
| <b>Other Tumor Development</b>               |                                                                           |                                                                          |                                                                                                  |
| Age and Type of Tumor                        | <b>8.5 months<br/>Pancreatoblastoma</b>                                   | <b>No other tumors<br/>developed through<br/>last follow-up</b>          | <b>3 months<br/>Adrenocortical carcinoma</b>                                                     |
| <i>Diagnosis Comments</i>                    | <i>2 distinct lesions; No specific<br/>treatment required (calcified)</i> |                                                                          | <i>Adrenal pseudocyst and adrenal cortex<br/>cytomegaly also diagnosed through<br/>pathology</i> |
| <b>Age at Last Follow-Up</b>                 | <b>3 years, 1 month</b>                                                   | <b>4 years, 7 months</b>                                                 | <b>6 years, 6 months</b>                                                                         |
| Patient Status                               | Alive and Well (NED)                                                      | Alive and Well (NED)                                                     | Alive and Well (NED)                                                                             |

<sup>1</sup> Patient was adopted – limited prenatal history is known; Twin not affected by BWSp (*long-term outcome unknown*).<sup>2</sup> Girth asymmetry assessed by absolute value between difference of circumference at reference point in each limb compared to the smaller limb size (*assumed limb without 'overgrowth'*).

Table Abbreviations: ART=Assisted Reproductive Technique; BWSp=Beckwith-Wiedemann Spectrum; HB=Hepatoblastoma; NED=No Evidence of Disease; pUPD11=paternal uniparental isodisomy of chromosome 11; TR=Tongue Reduction.

**Table S2.** Epigenotype and Somatic HB Profiles Established in Samples Collected from Patients with pUPD11 and Multiple Tumor Development.

| Samples Analyzed <sup>1</sup>  | SNP Testing                                                                       | Methylation (IC2 region) | Methylation (IC1 region) | 11p15 Mosaic Burden                                                         | Profile Established      |
|--------------------------------|-----------------------------------------------------------------------------------|--------------------------|--------------------------|-----------------------------------------------------------------------------|--------------------------|
| Patient #07 (Female)           |                                                                                   |                          |                          |                                                                             |                          |
| Blood                          | 65-70% LOH                                                                        | 13.06% (LOM)             | 80.39% (GOM)             | 67.30%                                                                      | pUPD11<br>(11p15.5p15.2) |
| Skin Biopsy                    | 40% LOH                                                                           | -                        | -                        | -                                                                           |                          |
| Patient #08 (Female)           |                                                                                   |                          |                          |                                                                             |                          |
| Blood                          | ~65% LOH                                                                          | 16.87% (LOM)             | 80.27% (GOM)             | 63.40%                                                                      | pUPD11<br>(11p15.5)      |
| Skin Biopsy                    | ~30% LOH                                                                          | -                        | -                        | -                                                                           |                          |
| Normal Liver (HB1)             | -                                                                                 | 13.43% (LOM)             | 81.92% (GOM)             | 68.49%                                                                      |                          |
| First Primary (HB1)            | -                                                                                 | 1.60% (LOM)              | 90.54% (GOM)             | 88.94%                                                                      |                          |
| Patient #19 (Male)             |                                                                                   |                          |                          |                                                                             |                          |
| Blood                          | 50-55% LOH                                                                        | +LOM (OSH)               | +GOM (OSH)               | N/A                                                                         | pUPD11<br>(11p15.5p14.1) |
| Skin Biopsy                    | 30-35% LOH                                                                        | 35.45% (LOM)             | 64.83% (GOM)             | 29.38%                                                                      |                          |
| Tongue                         | 40-45% LOH                                                                        | 30.87% (LOM)             | 69.84% (GOM)             | 38.97%                                                                      |                          |
|                                |                                                                                   |                          |                          |                                                                             |                          |
| Tumor Testing <sup>2</sup>     | Copy Number Variation (CNV)                                                       |                          |                          | Somatic Sequence Variants <sup>3</sup>                                      |                          |
| Patient #07 (HB)               | None detected within limits of assay                                              |                          |                          | CTNNB1, c.100G>A (p.Gly34Arg)<br>ARID1A, c.6698_6704del (p.Arg2233Profs*32) |                          |
| Patient #08 (HB1)              | None detected within limits of assay                                              |                          |                          | CTNNB1, c.98C>T (p.Ser33Phe)                                                |                          |
| Patient #08 (HB2) <sup>4</sup> | Loss of partial chromosome 1p<br>Possible low-level mosaic gain of partial chr 1q |                          |                          | CTNNB1, c.101G>T (p.Gly34Val)                                               |                          |

<sup>1</sup> Blood samples collected pre-tumor detection in Patient #07 and #08, and post-tumor detection in Patient #19. Skin samples collected during surgical procedures for patient care and specific source of skin biopsy included: omphalocele repair site (#07); left abdomen (#08); and left thigh (#19).

<sup>2</sup> Testing on HB samples included next generation sequencing (NGS) analysis of genes in the Children's Hospital of Philadelphia (CHOP) Comprehensive Solid Tumor NGS Panel performed on DNA and RNA extracted from tumor sample; The genes included in the panel and reference sequences used for these genes are listed at: <https://apps.chop.edu/service/laboratories/olsd.cfm/division-genomic-diagnostics>. The mutation nomenclature is based on the convention recommended by the Human Genome Variation Society (<http://www.hgvs.org/mutnomen/>).

<sup>3</sup> Variants classified as 'Potential Clinical Significance' listed; Reference/Isoforms: *CTNNB1* (NM\_001904.3); *ARID1A* (NM\_006015.5)

<sup>4</sup> Second HB detected approximately one year after first HB in patient. Classified as a second primary HB due to different somatic variants: no CNVs were detected in first sample and two different *CTNNB1* variants were detected; differing pathology characteristics compared to first tumor were also observed.

*Table Abbreviations:* ART=Assisted Reproductive Technique; BWSp=Beckwith-Wiedemann Spectrum; GOM=Gain of Methylation; HB=Hepatoblastoma; IC1= Imprinting Control region 1 (*H19/IGF2:IG-DMR*); IC2= Imprinting Control region 2 (*KCNQ1OT1:TSS-DMR*); LOH=Loss of Heterozygosity; LOM=Loss of Methylation; N/A=Not Applicable; OSH=Outside hospital/laboratory; pUPD11=paternal uniparental isodisomy of chromosome 11; SNP= Single nucleotide polymorphism array testing.

**Table S3.** Comparison of Clinical Characteristics and Hepatoblastoma (HB) Development History in Two Male Patients with IC2 LOM.

|                                                                            | Patient #01                                                                                             | Patient #02                                                                                                                                         |
|----------------------------------------------------------------------------|---------------------------------------------------------------------------------------------------------|-----------------------------------------------------------------------------------------------------------------------------------------------------|
| <b>Patient Characteristics</b>                                             |                                                                                                         |                                                                                                                                                     |
| Patient Sex                                                                | Male                                                                                                    | Male                                                                                                                                                |
| Diversity Group                                                            | White (non-Hispanic)                                                                                    | White (non-Hispanic)                                                                                                                                |
| Blood Epigenotype Profile (cell burden)                                    | IC2 LOM (99.90%)                                                                                        | IC2 LOM (98.02%)                                                                                                                                    |
| BWSp Clinical Score (Group)                                                | 14 (Severe)                                                                                             | 10 (Severe)                                                                                                                                         |
| <b>Peri-Conception and Prenatal Profiles</b>                               |                                                                                                         |                                                                                                                                                     |
| Conception Type                                                            | Natural conception                                                                                      | IVF-ICSI (Clomp stim + egg donor)                                                                                                                   |
| Twinning History                                                           | No report of vanishing twin, etc                                                                        | Male Twins (discordant)                                                                                                                             |
| Prenatal Phenotype                                                         | Severe BWSp<br>(+Omphalocele, +Enlarged Kidneys/Liver)                                                  | Severe BWSp<br>(+Omphalocele, +Macroglossia)                                                                                                        |
| Pregnancy Complications                                                    | Premature Rupture of Membranes (PROM)<br>No Polyhydramnios                                              | Bleeding, Pre-Eclampsia<br>+ Polyhydramnios                                                                                                         |
| Placenta Characteristics Known                                             | Severe Placentomegaly (trimmed weight=882 grams)<br>Placental Mesenchymal Dysplasia (PMD)               | Placenta Previa                                                                                                                                     |
| Gestational Age at Birth                                                   | 34 <sup>6/7</sup> weeks                                                                                 | 28 <sup>6/7</sup> weeks                                                                                                                             |
| <b>Common BWSp Features</b>                                                |                                                                                                         |                                                                                                                                                     |
| Macroglossia Severity                                                      | TR age: ~1 year ( <i>no tracheostomy</i> )                                                              | TR age: 6 months ( <i>+ tracheostomy</i> )                                                                                                          |
| Hypoglycemia Severity                                                      | Hyperinsulinism (resolved)                                                                              | Transient                                                                                                                                           |
| Lateralized Overgrowth                                                     | Yes (mild)                                                                                              | Yes (+LLD)                                                                                                                                          |
| <b>Other Phenotypic Features</b>                                           |                                                                                                         |                                                                                                                                                     |
| Genitourinary (GU) Abnormalities                                           | Undescended Testes and Inguinal Hernia                                                                  | Undescended Testes and Inguinal Hernia                                                                                                              |
| Gastrointestinal (GI) Issues                                               | Gastroesophageal reflux disease (GERD)                                                                  | Gastrotomy Tube Dependence                                                                                                                          |
| Cardiopulmonary Issues                                                     | Critical pulmonary stenosis requiring valvuloplasty                                                     | Pulmonary hypertension requiring tracheostomy                                                                                                       |
| Other Birth Issues                                                         | Sacral dimple                                                                                           | Bronchopulmonary Dysplasia                                                                                                                          |
| <b>Hepatoblastoma Diagnosis</b>                                            |                                                                                                         |                                                                                                                                                     |
| Age at First Detection                                                     | 6 weeks (screening: AFP + Abd U/S)                                                                      | 11-12 months (screening: AFP + Abd U/S)                                                                                                             |
| Detection Comments                                                         | Solitary well-circumscribed hypovascular mass <sup>1</sup><br>(Pathology=Stage 1 (COG))                 | Large right lobe mass<br>(formal lobectomy)                                                                                                         |
| Alpha-Fetoprotein (AFP) Trend                                              | Rapid increase <sup>2</sup> after imaging detection<br>and close follow-up (decreased from birth value) | Rising values                                                                                                                                       |
| <b>Additional HB Development:<br/>Characteristics and Age at Detection</b> | No HB or other tumors developed<br>through last follow-up                                               | 25 months<br>Metastatic lesion<br>(local left lobe resection)<br><br>6 years, 2 months<br>Single lesion in lateral left lobe<br>(hepatic resection) |
| <b>Age at Treatment Completion</b>                                         | 5-6 months                                                                                              | 6 years, 4 months                                                                                                                                   |
| <b>Age at Last Follow-Up</b>                                               | 6 years, 4 months                                                                                       | 10 years, 8 months                                                                                                                                  |
| Patient Status                                                             | Alive and Well (NED)                                                                                    | Alive and Well (NED)                                                                                                                                |

<sup>1</sup> Impression of mass through MRI (magnetic resonance imaging) was thought to represent atypical hemangioma without classic vascular enhancement; however, HB could not be completely excluded. Clinical correlation with rising AFP values led to biopsy which confirmed HB and upfront resection was performed. Pathology was consistent with Children's Oncology Group (COG) Stage 1 HB.

<sup>2</sup> Alpha-fetoprotein (AFP) values measured in patient throughout work-up, resection, and last follow-up include: 323,000 ng/mL (birth-normal imaging); 3,530 ng/mL (imaging detection at 6 weeks); 3,930 ng/mL (4 days later); 6,650 ng/mL (1 week later); 9,910 ng/mL (pre-biopsy, 3 weeks post-imaging); 2,690 ng/mL (post-resection); 133 ng/mL (treatment completion); 3.7 ng/mL (last AFP performed at 5 years, 1 month of age).

*Table Abbreviations:* Abd U/S=Ultrasound (full abdominal); BWSp=Beckwith-Wiedemann Spectrum; Clomp stim=clomiphene stimulation of ovaries; HB=Hepatoblastoma; IC2 LOM=Loss of methylation at Imprinting Control region 2 (*KCNQ1OT1*:TSS-DMR); NED=No Evidence of Disease; LLD=Leg Length Discrepancy; TR=Tongue Reduction.

**Table S4.** Additional Evidence for Tissue Mosaicism Associated with ART, IC1 GOM, and WT Development.

| Patient #17 (Male)            |                                            | Characteristics and Phenotype Profiles <sup>1</sup>                                                                         |                 |                                               |
|-------------------------------|--------------------------------------------|-----------------------------------------------------------------------------------------------------------------------------|-----------------|-----------------------------------------------|
| <b>Prenatal Profile:</b>      |                                            | ART (Clomiphene stimulation); Twin Males (di-di); Pre-Eclampsia                                                             |                 |                                               |
| <b>Birth Phenotype:</b>       |                                            | GA=35 5/7 weeks; Hydronephrosis (screening initiated); Heart murmur (transient)                                             |                 |                                               |
| <b>Craniofacial Profile:</b>  |                                            | Mild tongue protrusion (normal thyroid) <sup>2</sup> ; Ear creases/pits                                                     |                 |                                               |
| <b>GU Phenotype:</b>          |                                            | Prenatal asymmetric hydronephrosis (diagnosed 24 weeks gestation, confirmed at birth)                                       |                 |                                               |
| <b>BWSp Phenotype:</b>        |                                            | Post-WT appreciated to have LO and history of umbilical hernia                                                              |                 |                                               |
| <b>Other Notable:</b>         |                                            | G6PD deficiency in both twins (glucose-6-phosphate-dehydrogenase deficiency)                                                |                 |                                               |
| <b>Tumor Presentation:</b>    |                                            | Incidental detection during routine imaging for GU anomaly                                                                  |                 |                                               |
|                               |                                            |                                                                                                                             |                 |                                               |
| Samples Analyzed <sup>3</sup> | 11p15 Copy Number                          | IC2 Methylation                                                                                                             | IC1 Methylation | Summary                                       |
| <b>Kidney</b> (normal)        | KCNQ1 duplication<br>Normal IC1 (2 copies) | 50.18% (N)                                                                                                                  | 82.37% (GOM)    | +11p15 (IC1 GOM)<br>Mosaic Burden: 64.74%     |
| <b>Kidney</b> (WT)            | KCNQ1 duplication<br>Normal IC1 (2 copies) | 49.11% (N)                                                                                                                  | 88.00% (GOM)    | +11p15 (IC1 GOM)<br>Mosaic Burden: 76.00%     |
| <b>Blood</b> (post-WT)        | N/A                                        | 48.52% (N)                                                                                                                  | 52.33% (N)      | No 11p15 detectable<br>Mosaic Burden: <3%     |
|                               |                                            |                                                                                                                             |                 |                                               |
| Patient #20 (Female)          |                                            | Characteristics and Phenotype Profiles <sup>4</sup>                                                                         |                 |                                               |
| <b>Prenatal Profile:</b>      |                                            | IVF conception; Twin (female-male); No issues (GA=34 weeks)                                                                 |                 |                                               |
| <b>BWSp Phenotype:</b>        |                                            | LO, ear crease, nephromegaly (4 points; Atypical/ILO); Male twin=no BWSp                                                    |                 |                                               |
| <b>Craniofacial Profile:</b>  |                                            | Mild frontal bossing                                                                                                        |                 |                                               |
| <b>GU Phenotype:</b>          |                                            | Nephromegaly with asymmetry diagnosed on initial scan and on follow-ups                                                     |                 |                                               |
| <b>Tumor Presentation:</b>    |                                            | Symptomatic with detection on imaging<br>Post-BWSp screening program (17 months after normal imaging at 7 years, 10 months) |                 |                                               |
|                               |                                            |                                                                                                                             |                 |                                               |
| Samples Analyzed <sup>5</sup> | SNP Array Result                           | IC2 Methylation                                                                                                             | IC1 Methylation | Summary                                       |
| <b>Blood</b> (7mo)            | Normal Female                              | Normal                                                                                                                      | Normal          | No 11p15 detected (OSH)<br>Mosaic Burden: N/A |
| <b>Skin</b> (left abdomen)    | Normal Female                              | 49.61% (N)                                                                                                                  | 60.26% (GOM)    | +11p15 (IC1 GOM)<br>Mosaic Burden: 20.52%     |
| <b>Kidney</b> (normal)        | Normal Female                              | 50.96% (N)                                                                                                                  | 83.62% (GOM)    | +11p15 (IC1 GOM)<br>Mosaic Burden: 67.24%     |
| <b>Kidney</b> (WT)            | Normal Female                              | 48.47% (N)                                                                                                                  | 66.88% (GOM)    | +11p15 (IC1 GOM)<br>Mosaic Burden: 33.76%     |

<sup>1</sup> Additional characteristics and phenotype data for Patient 9 described by MacFarland et al. (2018), PMID: 29932284.

<sup>2</sup> Classified with macroglossia on initial report – retrospective review demonstrated no official ‘macroglossia’ diagnosis was made and patient had history of mild tongue protrusion during first year of life (normal tongue at physical examinations post-tumor).

<sup>3</sup> Kidney samples collected during tumor resection at age 33m; Blood sample collected at age 6.5 years (new data collected since MacFarland et al.)

<sup>4</sup> Additional characteristics and phenotype data for patient described by Fischer et al. (2021), PMID: 33581236.

<sup>5</sup> Skin and kidney samples collected at time of tumor resection at approximately 9.5 years of age (3 months post-WT diagnosis and initial treatment); Skin sample collected from surgical incision margin on LO side of patient (full body L>R asymmetry).

**Table S5.** Evidence for Tissue Mosaicism Associated with Neuroblastoma (NBL) Development in Two Patients with BWSp and Epigenotypes other than *CDKN1C* mutations.

| Patient #21 (Male)                                                        |                     | Characteristics and Phenotype Profiles                                                                                                                                                                          |                 |                                          |
|---------------------------------------------------------------------------|---------------------|-----------------------------------------------------------------------------------------------------------------------------------------------------------------------------------------------------------------|-----------------|------------------------------------------|
| Prenatal Profile:                                                         |                     | Natural conception; Singleton; Pre-Eclampsia and LGA                                                                                                                                                            |                 |                                          |
| BWSp Phenotype:                                                           |                     | HI, LO, LGA (5 points; Atypical/ILO); Possible neonatal FNS (resolved by 7 weeks of age)                                                                                                                        |                 |                                          |
| Craniofacial Profile:                                                     |                     | Slightly high palate (no cleft); Ears upturned with squared off helices (no creases); Deep-set eyes                                                                                                             |                 |                                          |
| GU Phenotype:                                                             |                     | No kidney or liver abnormalities on imaging; No hepatosplenomegaly by palpation                                                                                                                                 |                 |                                          |
| NBL Tumor Presentation:                                                   |                     | Incidental Detection (CT scan for other medical issue); Positive MIBG; Negative HVA/VMA                                                                                                                         |                 |                                          |
| 11p15 Epigenotype (BWSp) Profiles                                         |                     |                                                                                                                                                                                                                 |                 |                                          |
| Sample                                                                    | SNP Testing         | IC2 Methylation                                                                                                                                                                                                 | IC1 Methylation | Summary                                  |
| Blood                                                                     | Normal chromosome 6 | Normal                                                                                                                                                                                                          | Normal          | No 11p15 (OSH testing)                   |
| Skin (abdomen)                                                            | Normal Male         | 49.58% (N)                                                                                                                                                                                                      | 49.82% (N)      | Normal 11p15 Mosaic Burden: <3%          |
| Pancreas (normal)                                                         | ~15% LOH 11p15.5p13 | 43.06% (LOM)                                                                                                                                                                                                    | 60.80% (GOM)    | +11p15 (pUPD) Mosaic Burden: 17.74%      |
| Pancreas (affected)                                                       | ~45% LOH 11p15.5p13 | 25.30% (LOM)                                                                                                                                                                                                    | 72.17% (GOM)    | +11p15 (pUPD) Mosaic Burden: 46.87%      |
| Thoracic Mass (NBL)                                                       | Near triploid range | 37.43% (LOM)                                                                                                                                                                                                    | 62.77% (GOM)    | +11p15 abnormality Mosaic Burden: 25.34% |
|                                                                           |                     |                                                                                                                                                                                                                 |                 |                                          |
| Patient #03 (Female)                                                      |                     | Characteristics and Phenotype Profiles                                                                                                                                                                          |                 |                                          |
| Prenatal Profile:                                                         |                     | MZ-triplets (natural); TRAP sequence with acardiac fetus (proband=donor) Proband with severe BWSp (+IC2 LOM); Polyhydramnios; Twin – No Issues                                                                  |                 |                                          |
| Birth Outcome:                                                            |                     | Born at GA=27 <sup>3/7</sup> due to PPROM; Two live born female twins with discordant BWSp phenotypes (concordant blood); Placental Mesenchymal Dysplasia (PMD) diagnosed through pathology                     |                 |                                          |
| BWSp Phenotype and Craniofacial Profile                                   |                     | Giant Omphalocele (entire liver extra-abdominal) Nephromegaly Macroglossia (+TR); Cleft palate; Prominent occiput; Dysmorphic appearance BWSp Clinical Score = 8 points; Features Not Present: Hypoglycemia, LO |                 |                                          |
| Other Notable Features:                                                   |                     | Cardiac anomalies (Large VSD detected prenatally); CDH (congenital diaphragmatic hernia); Tracheostomy required                                                                                                 |                 |                                          |
| NBL Tumor Presentation:                                                   |                     | Incidental Detection (CT scan for other medical issue); Positive MIBG; Elevated HVA/VMA                                                                                                                         |                 |                                          |
| 11p15 Epigenotype (BWSp) Profiles                                         |                     |                                                                                                                                                                                                                 |                 |                                          |
| Samples                                                                   | SNP Testing         | IC2 Methylation                                                                                                                                                                                                 | IC1 Methylation | Summary                                  |
| Amniocytes                                                                | Normal Female       | 18.94% (LOM)                                                                                                                                                                                                    | 53.80% (N)      | +11p15 (IC2 LOM) Mosaic Burden: 62.12%   |
| Blood                                                                     | Normal Female       | 23.75% (LOM)                                                                                                                                                                                                    | 49.42% (N)      | +11p15 (IC2 LOM) Mosaic Burden: 52.50%   |
| Tongue                                                                    | NP                  | 17.39% (LOM)                                                                                                                                                                                                    | 50.07% (N)      | +11p15 (IC2 LOM) Mosaic Burden: 65.22%   |
| BWSp Phenotype and Epigenotype Profile Established in Twin of Patient #03 |                     |                                                                                                                                                                                                                 |                 |                                          |
| #03 Twin BWSp Phenotype:                                                  |                     | Transient hypoglycemia, Minor Abdominal Wall Defect – Umbilical Hernia                                                                                                                                          |                 |                                          |

| BWSp Clinical Score = 4 points <i>(shared PMD-placental mesenchymal dysplasia)</i> |               |                 |                 |                                           |
|------------------------------------------------------------------------------------|---------------|-----------------|-----------------|-------------------------------------------|
| Samples                                                                            | SNP Testing   | IC2 Methylation | IC1 Methylation | Summary                                   |
| Amniocytes                                                                         | Normal Female | NP              | NP              | Not suspected for BWSp prenatally         |
| Blood                                                                              | Normal Female | 23.81% (LOM)    | 50.50% (N)      | +11p15 (IC2 LOM)<br>Mosaic Burden: 52.38% |

**Abbreviations:**

BWSp=Beckwith-Wiedemann Spectrum; CT=Computed tomography; FNS=facial nevus simplex; GA=Gestational age (weeks); GOM=Gain of methylation (hypermethylation); HI=Hyperinsulinism; HVA/VMA=homovanillic acid/vanillylmandelic acid; IC1=Imprinting Control region 1 (*H19/IGF2*:IG-DMR); IC2=Imprinting Control region 2 (*KCNQ1OT1*:TSS-DMR); ILO=Isolated Lateralized Overgrowth; LGA=Large for gestational age (>2 standard deviations above mean); LO=Lateralized Overgrowth; LOM=Loss of Methylation (hypomethylation); MIBG=meta-iodobenzylguanidine; MZ=Monozygotic; N=normal; NP=not performed; OSH=outside hospital/laboratory; SNP=single nucleotide polymorphism; TR=tongue reduction; TRAP=Twin Reversed Arterial Perfusion Sequence; VSD=ventricular septal defect.
